# Supplementary material for: RACK7 recognizes H3.3G34R mutation to suppress expression of MHC class II complex components and their delivery pathway in pediatric glioblastoma
Source: PubMed Central journal article supplement — Sci Adv. 2020 Jul 17;6(29):eaba2113. doi: 10.1126/sciadv.aba2113 (PMC7439511; doi:10.1126/sciadv.aba2113), 2020-07-17
Supplement: aba2113_SM.pdf [file aba2113_SM.pdf]

## Supplementary Materials for

### **RACK7 recognizes H3.3G34R mutation to suppress expression of MHC class II complex components and their delivery pathway in pediatric glioblastoma**

Fangfang Jiao, Ze Li, Chen He, Wenqi Xu, Gensheng Yang, Tingting Liu, Hongjie Shen, Jiajun Cai, Jamie N. Anastas, Ying Mao, Yongchun Yu, Fei Lan, Yujiang Geno Shi, Chris Jones, Yanhui Xu, Suzanne J. Baker\*, Yang Shi\*, Rui Guo\*

\*Corresponding author. Email: [suzanne.baker@stjude.org](mailto:suzanne.baker@stjude.org) (S.J.B.); [yshi@hms.harvard.edu](mailto:yshi@hms.harvard.edu) (Y.S.); [guorui@fudan.edu.cn](mailto:guorui@fudan.edu.cn) (R.G.)

Published 17 July 2020, *Sci. Adv.* **6**, eaba2113 (2020)  
DOI: 10.1126/sciadv.aba2113

#### **This PDF file includes:**

Figs. S1 to S6  
Tables S1 to S4

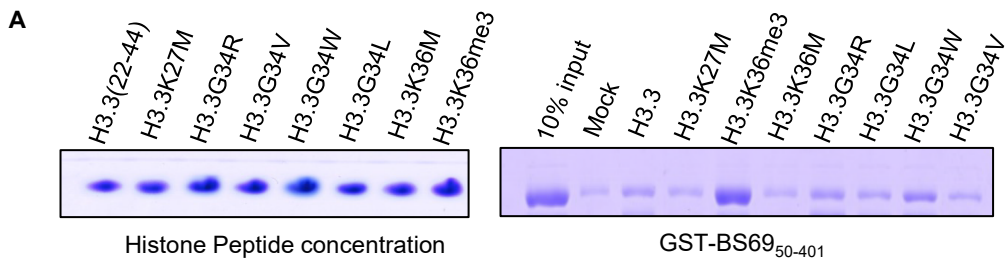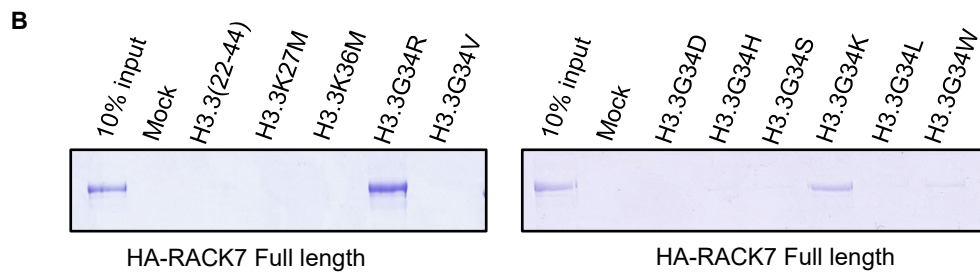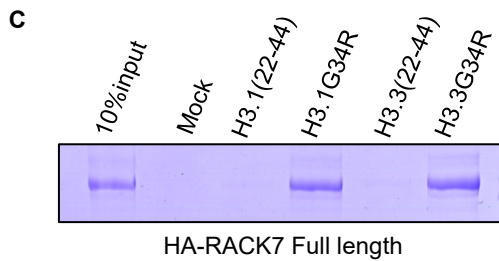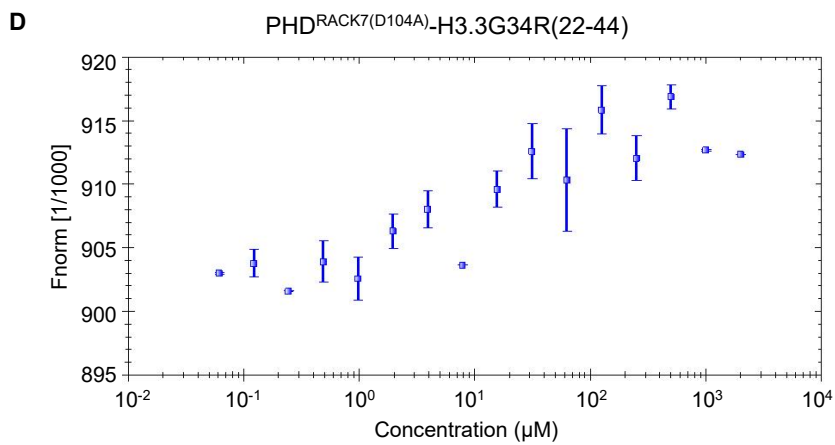

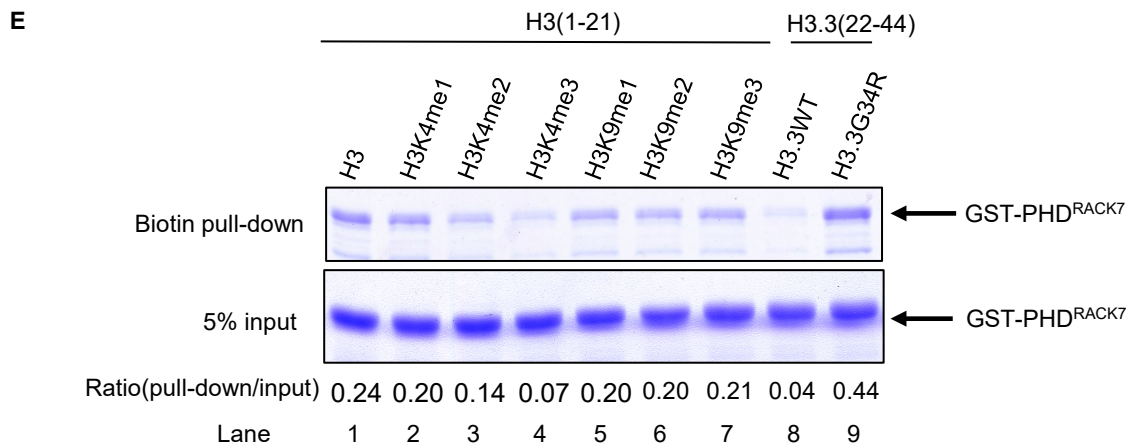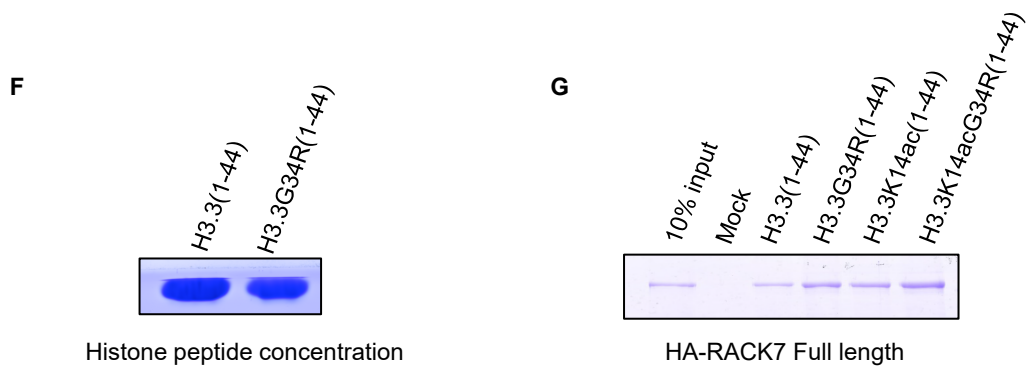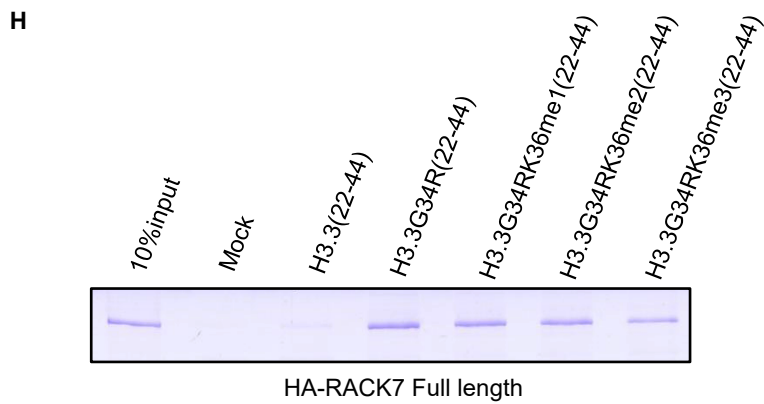

**Fig. S1.**

**RACK7 recognizes H3.3G34R mutation.** (A) *In vitro* peptide pull-down assays using various H3.3 peptides and GST-tagged BS69<sub>50-401</sub> purified from *E. coli*. Left panel: the concentration of the peptides used in the peptide pull-down assays. Right panel: the biotinylated peptides were immobilized on streptavidin beads and the bound proteins were subject to SDS-PAGE and visualized by Coomassie blue staining. (B) Peptide pull-down assays using indicated biotinylated peptides and the HA-tagged full length RACK7. Glycine at position 34 was replaced with various amino acids as indicated. (C) Peptide pull-down assays using the indicated biotinylated peptides and the HA-tagged full length RACK7. (D) MicroScale Thermophoresis analysis of the interaction between GST-tagged PHD<sup>RACK7(D104A)</sup> protein purified from *E. coli* with H3.3G34R(22-44) peptide. Data are represented as mean  $\pm$ SD from 3 biological replicates. (E) Peptide pull-down assays using the indicated biotinylated peptides and the GST-tagged PHD<sup>RACK7</sup> (F) Concentration of the peptides used in Fig. 1H and Fig. 1I. (G) Peptide pull-down assays using the indicated biotinylated peptides and the HA-tagged full length RACK7. (H) Peptide pull-down assays using the indicated biotinylated peptides and the HA-tagged full length RACK7. All experiments were repeated three times.

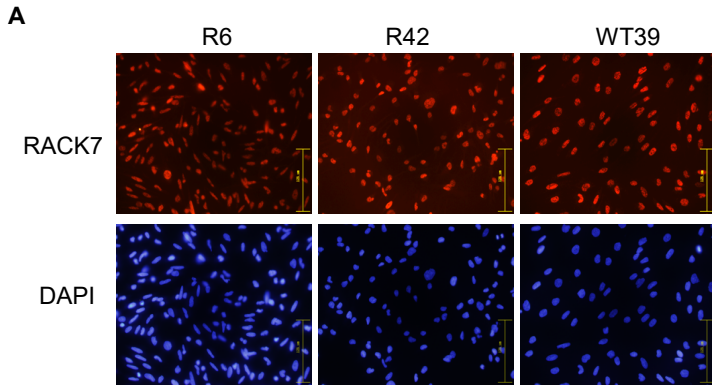

**B RACK7 ChIP-seq peaks**

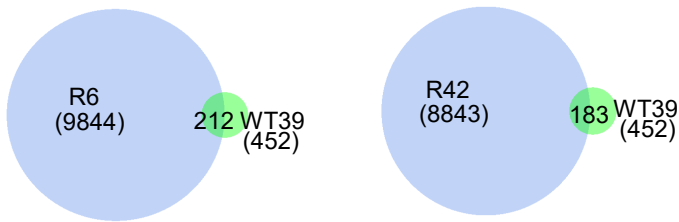

**C RACK7 ChIP-seq**

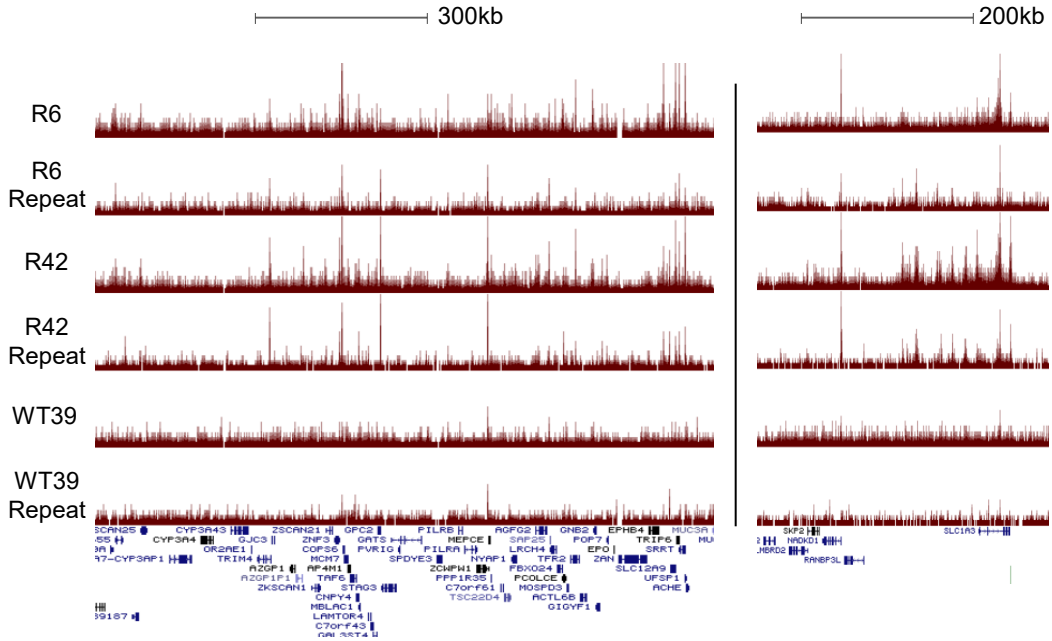

**D**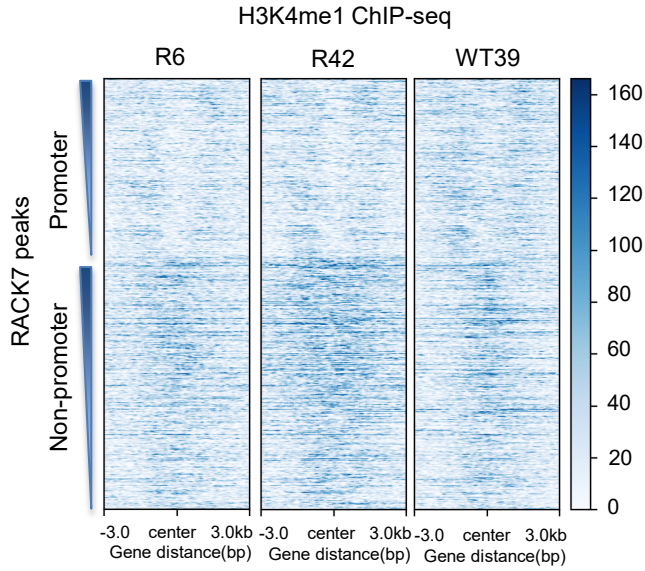**E**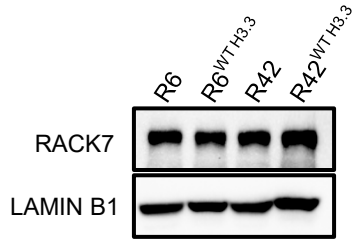**F**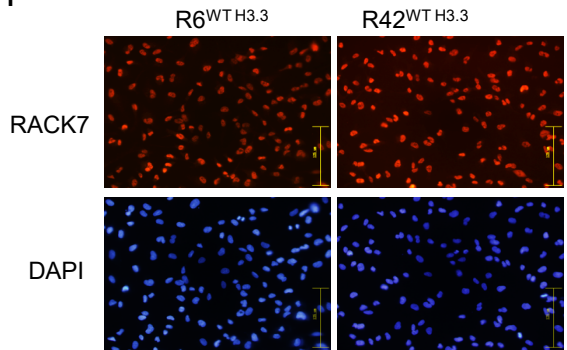**G**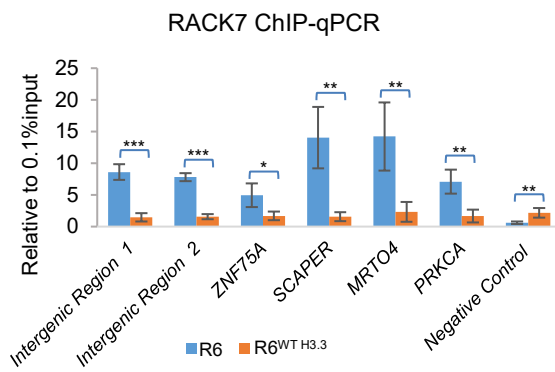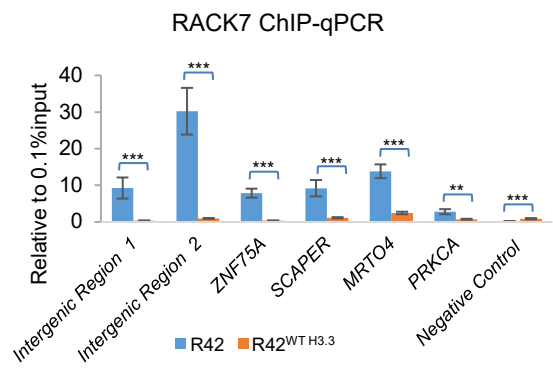

**Fig. S2.**

**RACK7 binds H3.3G34R chromatin in cells.** (A) Immunofluorescence assay of RACK7 in R6(left), R42(middle) and WT39(right) cells. (B) Venn diagram analysis of RACK7 ChIP-seq peaks in R6, R42 and WT39 cells. (C) Genome browser snapshots of selected RACK7 ChIP-seq signals in R6, R42 and WT39 cells from two biological repeats. (D) Heatmap analysis of H3K4me1 distribution, H3K4me1 ChIP-seq peaks were sorted by RACK7 enrichment. (E) Western blot of RACK7 level in R6, R6<sup>WT H3.3</sup>, R42, R42<sup>WT H3.3</sup> cells. (F) Immunofluorescence assay of RACK7 in R6<sup>WT H3.3</sup>(left) and R42<sup>WT H3.3</sup>(right) cells. (G) ChIP-qPCR validation of selected RACK7-bound peaks in R6, R6<sup>WT H3.3</sup>(left) and R42, R42<sup>WT H3.3</sup>(right) cells. Data are represented as mean  $\pm$  SD from 3 biological replicates, \* $P$ <0.05, \*\* $P$ <0.01, \*\*\* $P$ <0.001, two-tailed Student's  $t$ -test.





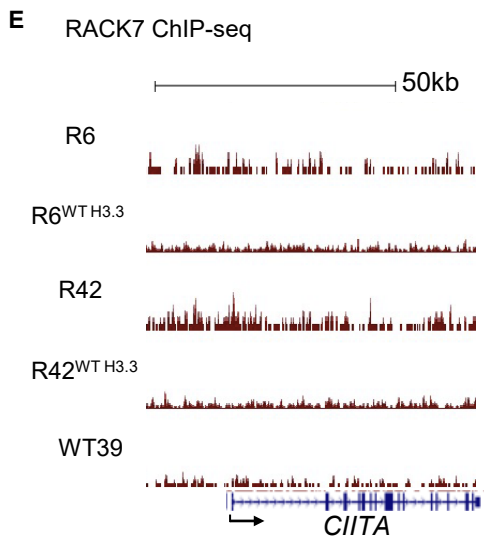

**Fig. S3.**

**RACK7 represses gene transcription through its binding to H3.3G34R mutation. (A)**

Venn diagram analysis of RACK7 ChIP-seq unique genes in R6 and R42 relative to their knock-in cells (R6<sup>WT H3.3</sup> and R42<sup>WT H3.3</sup>) and RNA-seq data of co-up regulated genes (1.5-fold ( $P < 0.05$ )) in R6<sup>WT H3.3</sup>, R42<sup>WT H3.3</sup> relative to their parental cells (R6 and R42), respectively. (B) Venn diagram analysis of RACK7 ChIP-seq unique genes in R6 and R42 relative to their knock-in cells (R6<sup>WT H3.3</sup> and R42<sup>WT H3.3</sup>) and RNA-seq data of co-down regulated genes (1.5-fold ( $P < 0.05$ )) in R6<sup>WT H3.3</sup>, and R42<sup>WT H3.3</sup> relative to their parental cells (R6 and R42), respectively. (C) RNA expression of MHC class I molecules from RNA-seq in R6, R6<sup>WT H3.3</sup>, R42 and R42<sup>WT H3.3</sup> cells. Data are represented as mean  $\pm$  SD from 2 biological replicates, \* $P < 0.05$ , two-tailed Student's t-test. (D) Genome browser snapshots of RACK7 ChIP-seq signals of MHC class II molecules and *CD74* in R6, R6<sup>WT H3.3</sup>, R42, R42<sup>WT H3.3</sup> and WT39 cells. (E) Genome browser snapshot of *CIITA* RACK7 ChIP-seq peaks in R6, R6<sup>WT H3.3</sup>, R42, R42<sup>WT H3.3</sup> and WT39 cells.

**A**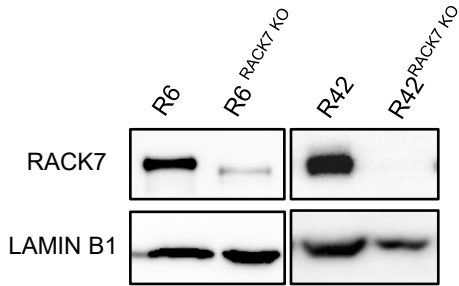**B** Up-regulated genes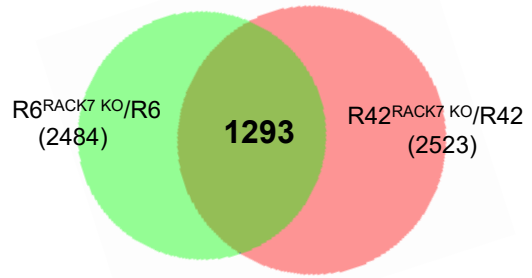**C**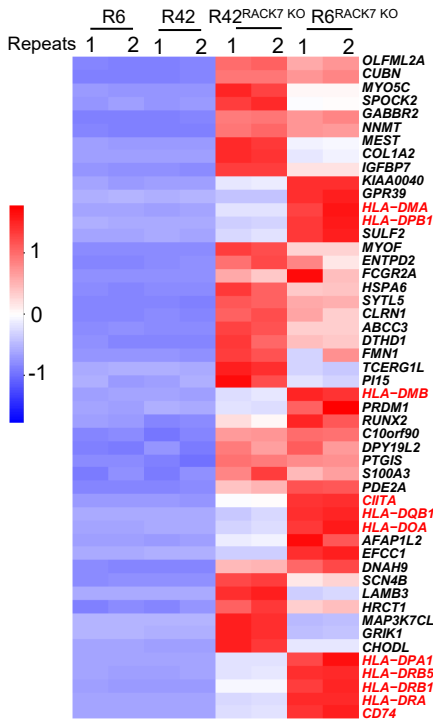**D**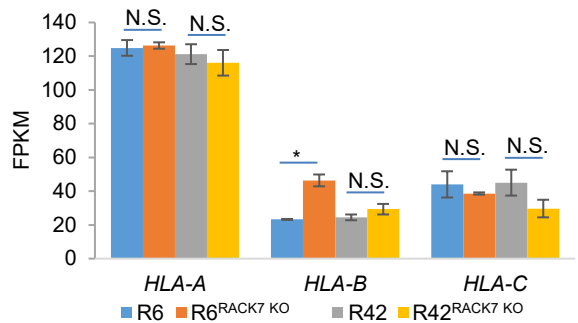**E**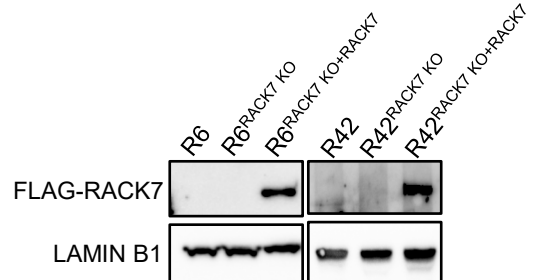**F**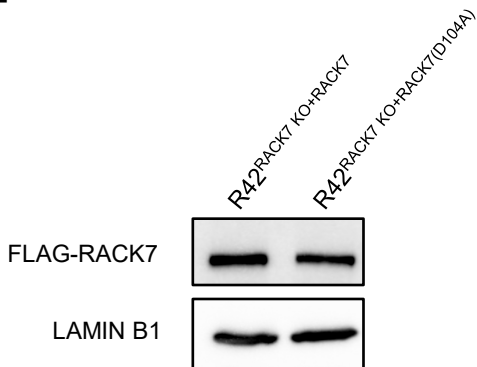**G** RT-qPCR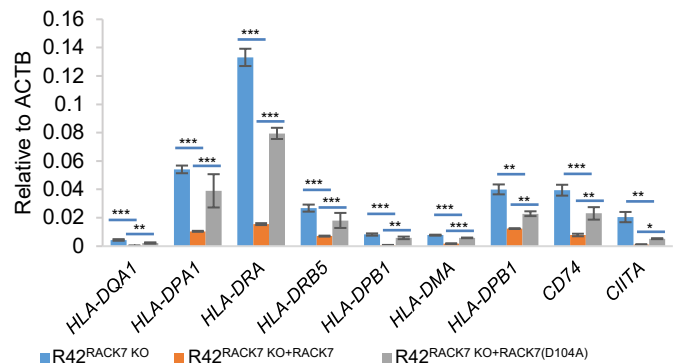

**H** H3.3G34R-HA ChIP-qPCR

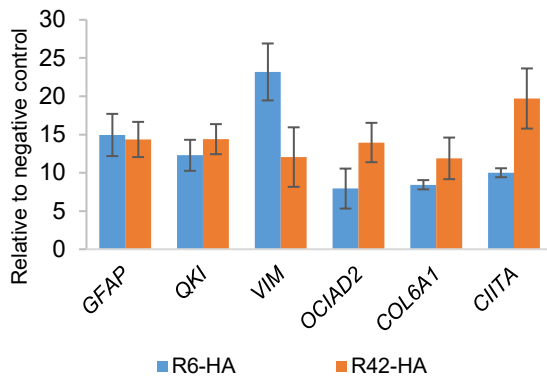

**I** RACK7 ChIP-qPCR

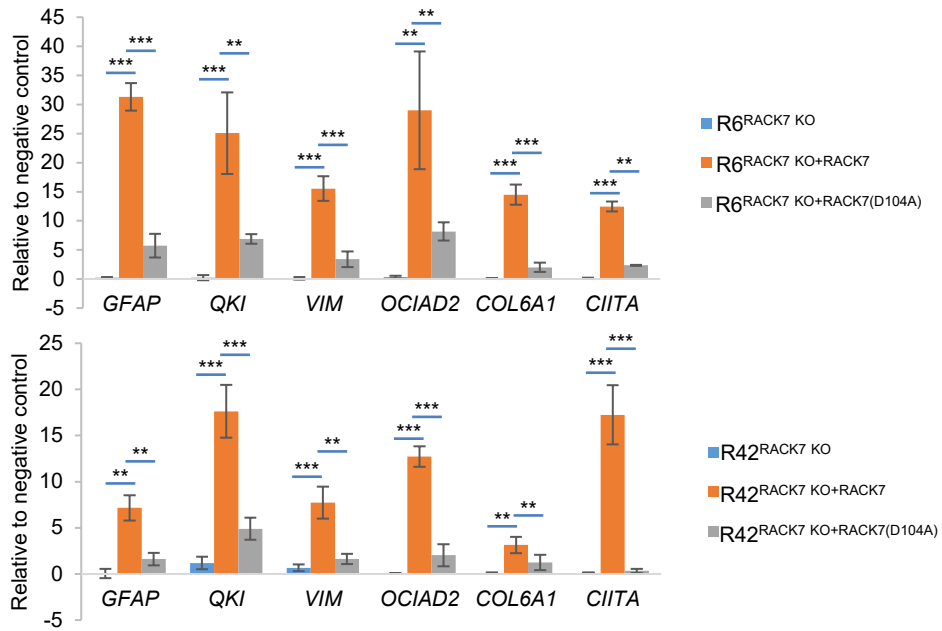

**J**

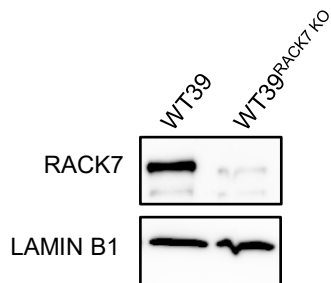

**Fig. S4.**

**RACK7 knockout has similar effects on gene expression as does H3.3 knock-in which corrects the G34R mutation.** (A) Western blot of RACK7 in indicated cells. (B) Venn diagram analysis of up-regulated genes (1.5-fold ( $P < 0.05$ )) in RACK7 KO cells compared to their parental cells, respectively. (C) Heatmap analysis of top-50 up-regulated genes in RACK7 KO cells compared with their parental cells. Sample order is based on the sum of  $\log_2(\text{Fold Change})$ . Scale indicated Z-score, defined as  $\Delta(\text{FPKM} - \text{mean FPKM})/\text{SD}$ . (D) FPKM value of MHC class I molecules based from RNA-seq in indicated cells, two biological repeats for each cell lines were used,  $*P < 0.05$ . (E and F) Western blot of FLAG-RACK7 in RACK7 KO cells rescued with wildtype (E) or D104A mutated (F) RACK7 transgene. (G) RT-qPCR analysis of mRNA expression in wildtype or D104A mutated RACK7 rescued cells. (H) ChIP-qPCR of selected H3.3G34R-bound peaks in R6 and R42 cells overexpressed with HA-tagged histone H3.3G34R. (I) ChIP-qPCR of selected RACK7-bound peaks in wildtype or D104A mutated RACK7 rescued cells. (J) Western blot of RACK7 in indicated cells. Data in G to I, are represented as mean  $\pm$  SD from 3 biological replicates,  $*P < 0.05$ ,  $**P < 0.01$ ,  $***P < 0.001$ , two-tailed Student's *t*-test.

**A** RACK7 ChIP-seq

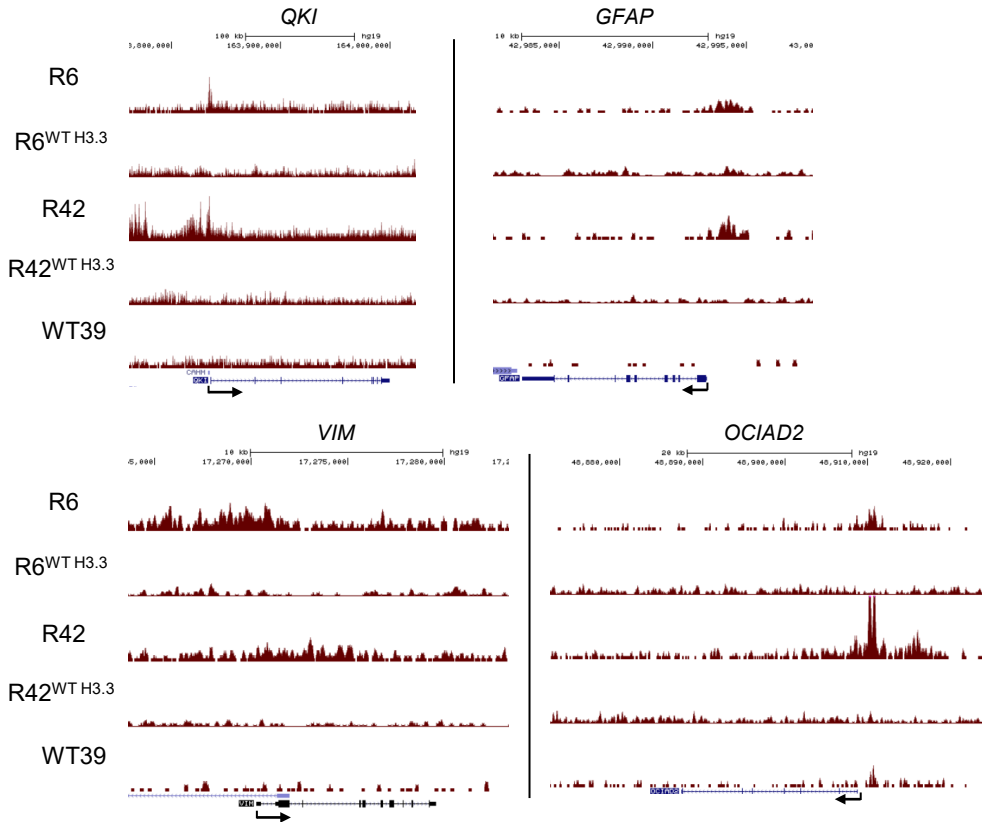

**Fig. S5.**

**RACK7 directly regulates *CIITA* and genes involved in vesicular transportation through its chromatin binding.** (A) Genome browser snapshots of selected RACK7 ChIP-seq signals in R42, R42<sup>WT</sup> H3.3, R6, R6<sup>WT</sup> H3.3 and WT39 cells.

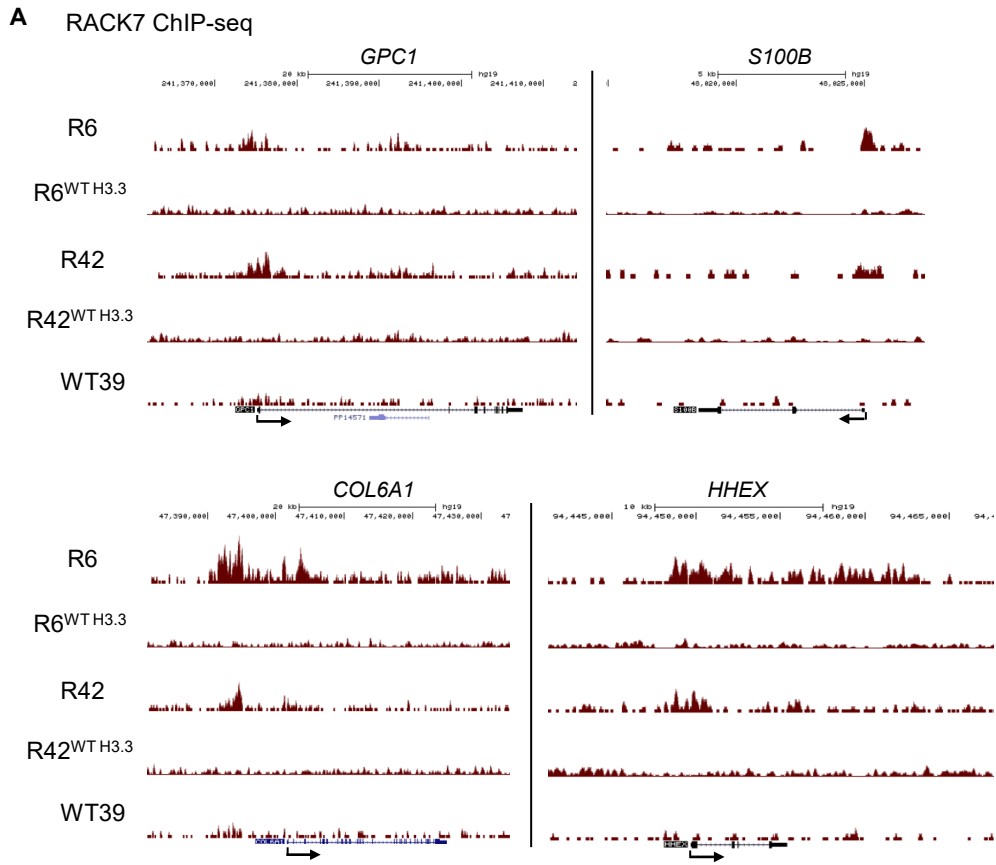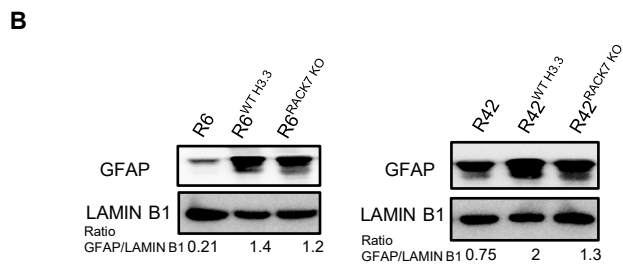

**Fig. S6.**

**RACK7 KO or H3.3 knock-in upregulates cell differentiation genes and inhibits cell migration and invasion. (A)** Genome browser snapshots of selected RACK7 ChIP-seq signals in R42, R42<sup>WT H3.3</sup>, R6, R6<sup>WT H3.3</sup> and WT39 cells. **(B)** Western blot analysis of GFAP in R6, R6<sup>WT H3.3</sup>, R6<sup>RACK7 KO</sup> (left) and R42, R42<sup>WT H3.3</sup>, R42<sup>RACK7 KO</sup> (right) cells.

**Table S1.**Effects of treatments on MHC class II level in tumor cells<sup>[37-40]</sup>.

| <b>Treatment</b>                   | <b>Type of tumor cells</b>   | <b>Effects</b>                       |
|------------------------------------|------------------------------|--------------------------------------|
| DNA-alkylating agents              | lymphoma cell line           | Activates CIITA and induces MHC-II   |
| JAK1/2 inhibitor ruxolitinib (RUX) | myeloid leukemia (CML) cells | Activates CIITA and induces MHC-II   |
| BRAF inhibitors                    | melanoma cells               | Enhances IFN-inductibility of MHC-II |
| HDAC inhibitors                    | various cancer cells         | Upregulates MHC-II                   |
| Demethylating agents-5-azacytidine | various cancer cells         | Upregulates MHC-II                   |
| IFN- $\gamma$                      | various cancer cells         | Upregulates MHC-II                   |
| Bacillus Calmette-Gue'rin          | bladder cancer               | Induces expression of MHC-II         |
| TLR7 agonists-Imiquimod            | cutaneous cancer cells       | Enhances expression of MHC-II        |
| TLR7/8 agonists-Resiquimod (R-848) | AML blasts                   | Upregulates MHC-II                   |
| CpG oligodeoxynucleotide           | tumor B cells                | Upregulates MHC-II                   |
| CD40 agonists                      | malignant B cells            | Enhances expression of MHC-II        |

**Table S2.**

List of antibodies used in the study.

| <b>Antibodies for immunoblotting</b>                                  |            |                           |                |            |
|-----------------------------------------------------------------------|------------|---------------------------|----------------|------------|
| Primary Abs                                                           | Clone      | Source                    | Catalog number | Dilution   |
| Rabbit anti-RACK7 Antibody                                            | Polyclonal | Bethyl                    | A302-089A      | 1:6000     |
| Mouse anti-LAMIN B1 Antibody                                          | 3C10G12    | Proteintech               | 66095-1-Ig     | 1:3000     |
| Mouse anti-FLAG-tag Antibody                                          | M2         | Sigma                     | F1804          | 1:3000     |
| Rabbit anti-GFAP Antibody                                             | Polyclonal | Proteintech               | 16825-1-AP     | 1:1000     |
| Rabbit anti-HLA-DRA Antibody                                          | Polyclonal | Proteintech               | 17221-1-AP     | 1:2000     |
| Rabbit anti-HLA-DRB5 Antibody                                         | Polyclonal | Proteintech               | 21702-1-AP     | 1:500      |
| <b>Antibodies for immunofluorescent (IF)</b>                          |            |                           |                |            |
| Primary Abs                                                           | Clone      | Source                    | Catalog number | Dilution   |
| Rabbit anti-RACK7 Antibody                                            | Polyclonal | Bethyl                    | A302-089A      | 1:500      |
| Rabbit anti-GFAP Antibody                                             | Polyclonal | Proteintech               | 16825-1-AP     | 1:250      |
| Rabbit anti-CD74 Antibody                                             | D5N3I      | Cell signaling technology | 77274          | 1:200      |
| <b>Antibody for Chromatin immunoprecipitation (ChIP) and ChIP-Seq</b> |            |                           |                |            |
| Antibody                                                              | Clone      | Source                    | Catalog number | Amount     |
| Rabbit anti-RACK7 Antibody                                            | Polyclonal | Bethyl                    | A302-089A      | 2 $\mu$ g  |
| Rabbit anti-histone H3K4me1 Antibody (pAb)                            | Polyclonal | Active motif              | 39297          | 5 $\mu$ l  |
| <b>Antibody for Flow Cytometry</b>                                    |            |                           |                |            |
| Antibody                                                              | Clone      | Source                    | Catalog number | Amount     |
| APC Mouse Anti-Human HLA-DR                                           | G46-6      | BD bioscience             | 560896         | 20 $\mu$ l |



**Table S3.**

List of DNA oligonucleotides used in ChIP-qPCR assay.

| <b>DNA oligonucleotides for ChIP-qPCR</b> |                        |
|-------------------------------------------|------------------------|
| <i>Intergenic region1</i> F               | TGTGTCTGTCCATCCCCTCTG  |
| <i>Intergenic region1</i> R               | AGAGAAACGGGCCTCCCTTAG  |
| <i>Intergenic region2</i> F               | GGAAGTCATGGGCATGAGGAT  |
| <i>Intergenic region2</i> R               | GTAGGTCTCTTCTCACGGCAG  |
| <i>ZNF75A</i> F                           | GCTTCAGCGGGTCTGGATAC   |
| <i>ZNF75A</i> R                           | AGTGGAAGTGACGCTTTCCG   |
| <i>SCAPER</i> F                           | GGGAGGTGTGAGGGTTGATT   |
| <i>SCAPER</i> R                           | ACGAGAAAGACCTGTGTGGC   |
| <i>MRTO4</i> F                            | CACGGGAAGTTGCCCTACAG   |
| <i>MRTO4</i> R                            | GTGCACCCCGTTAGGACC     |
| <i>PRKCA</i> F                            | GCACAGTCCTCACCTGGTTTC  |
| <i>PRKCA</i> R                            | GCATTTCTGAGCATCCCTTCTG |
| <i>CIITA</i> F                            | TTGGCATTAGGTCGCACTGT   |
| <i>CIITA</i> R                            | CAGTACCCAAGCACTCAGCA   |
| <i>HLA-DRA</i> F                          | GCCTTTCATCCTTCTCCAGTGT |
| <i>HLA-DRA</i> R                          | TTGGCAGTACTGAGGACATAGC |
| <i>HLA-DQA1</i> F                         | GCTACCACCAGCAGAGATCC   |
| <i>HLA-DQA1</i> R                         | GCCCTTTCTCTGGCTTCTGT   |
| <i>CD74</i> F                             | CAGGCAAATGTCCACTCCCT   |
| <i>CD74</i> R                             | TCCTCCTGCGTGTTTGAGAC   |
| Negative control F                        | CCATTCAACCCAAGGATGAGC  |
| Negative control R                        | TCTGCAATCATGGTCCTCACT  |
| <i>GFAP</i> F                             | TCGAGTTCCCACACATCAGC   |

|                 |                       |
|-----------------|-----------------------|
| <i>GFAP</i> R   | CCAGGTCTCAGGCTCCTAGT  |
| <i>QKIF</i>     | CATTCGAGCACGACTGACG   |
| <i>QKIR</i>     | GATCTTGTTGCACCTTCCCG  |
| <i>VIM</i> F    | AAGTCGATGGACAGAGGCG   |
| <i>VIM</i> R    | AGATCTGAAGTCGCGGAGAA  |
| <i>OCIAD2</i> F | CTGCCAGGACTGACTGAGTG  |
| <i>OCIAD2</i> R | GGTACAGGGACCAATTCGCA  |
| <i>COL6A1</i> F | CACGCTGGTTTTTCAGACGTT |
| <i>COL6A1</i> R | TGCAGTTCAGTCCCGTGTC   |

---

**Table S4.**

List of DNA oligonucleotides used in RT-qPCR assay.

| <b>DNA oligonucleotides for RT-qPCR</b> |                        |
|-----------------------------------------|------------------------|
| <i>CIITA F</i>                          | TGAGGCTGTGTGCTTCTGAG   |
| <i>CIITA R</i>                          | ACACTGTGAGCTGCCTTGG    |
| <i>HLA-DRB5 F</i>                       | CCTGGAGGTTCTACATGGC    |
| <i>HLA-DRB5 R</i>                       | AAGAAACGTGGTCGGGTGTC   |
| <i>HLA-DQA1 F</i>                       | GTGGCAAACACAACCTGAACA  |
| <i>HLA-DQA1 R</i>                       | TGACCTCAGGAACCTCATTGG  |
| <i>HLA-DPA1 F</i>                       | ATGCGCCCTGAAGACAGAAT   |
| <i>HLA-DPA1 R</i>                       | GACACATGGTCCGCCTTGAT   |
| <i>HLA-DRA F</i>                        | GGGTCTGGTGGGCATCATT    |
| <i>HLA-DRA R</i>                        | CCATCACCTCCATGTGCCTT   |
| <i>HLA-DPBI F</i>                       | GCAGGGCCACTCCAGAGAATTA |
| <i>HLA-DPBI R</i>                       | CCCCACGTCGCTGTGCGAA    |
| <i>HLA-DMA F</i>                        | CTATTGGGTACCCCGGAACG   |
| <i>HLA-DMA R</i>                        | ATCAGTCACCTGAGCAAGGC   |
| <i>HLA-DRB1 F</i>                       | GGTGGACAACACTGCAGACA   |
| <i>HLA-DRB1 R</i>                       | CACCTTAGGATGGACTCGCC   |
| <i>CD74 F</i>                           | GAGGTCCCCAACACCAGAAG   |
| <i>CD74 R</i>                           | CTCTCACATGGGGACTGGGC   |
| <i>QKI F</i>                            | GGTACCTGCAGCAGAAGGAG   |
| <i>QKI R</i>                            | GCAAGAGAAAAGGCAAGGGC   |
| <i>GFAP F</i>                           | GAGCCTCAAGGACGAGATGG   |
| <i>GFAP R</i>                           | TCCAGGCTGGTTTCTCGAAT   |

|                 |                       |
|-----------------|-----------------------|
| <i>VIM</i> F    | CGGGAGAAATTGCAGGAGGA  |
| <i>VIM</i> R    | AAGGTCAAGACGTGCCAGAG  |
| <i>OCIAD2</i> F | ACCAAGCAAGCAGAGCCTGT  |
| <i>OCIAD2</i> R | CCAAGGCCAAATCCCAAGAGA |
| <i>GPC1</i> F   | GAGGCTGGTGGCTGCTATG   |
| <i>GPC1</i> R   | GCAGGTGCTCACCCGAGAT   |
| <i>S100B</i> F  | GGTGAGACAAGGAAGAGGATG |
| <i>S100B</i> R  | TGTCTCCCTCCCTTCCAGAAT |
| <i>COL6A1</i> F | CCCGTGGACCTGTTCTTTGT  |
| <i>COL6A1</i> R | CACAGCGGTAGTACCTGTCC  |
| <i>HHEX</i> F   | CCCTGGGCAAACCTCTACTC  |
| <i>HHEX</i> R   | GGTTTTGACCTGTCTCTCGC  |
| <i>ACTB</i> F   | CATCCGCAAAGACCTGTACG  |
| <i>ACTB</i> R   | CCTGCTTGCTGATCCACATC  |

---
